# Supplementary material for: The nutrient distribution in the continuum of the pericarp, seed coat, and kernel during Styrax tonkinensis fruit development
Source: PeerJ. 2019 Oct 31;7:e7996. doi: 10.7717/peerj.7996 (PMC6825750; doi:10.7717/peerj.7996)
Supplement: Supplemental Information 6 [file peerj-07-7996-s006.xlsx]

## Sheet: Matter
Means and standard deviations								DAF	FM-pericarp(mg)	FM-seed coat(mg)	FM-kernel(mg)	DM-pericarp(mg)	DM-seed coat(mg)	DM-kernel(mg)	WC-pericarp	WC-seed caot	WC-kernel		30 DAF		30 DAF		40DAF		40DAF		50DAF		50DAF		60DAF		60DAF		70DAF		70DAF		80DAF		80DAF		90DAF		90DAF		100DAF		100DAF
FM	Pericarp	SD	Seed coat	SD	Kernel	SD		30	202.467	65.69	0.724	54.933	9.3	0.12	72.8682	85.8426	83.4254		Length-fruit(mm)	Width-fruit(mm)	Length-seed(mm)	Width-seed(mm)	Length-fruit(mm)	Width-fruit(mm)	Length-seed(mm)	Width-seed(mm)	Length-fruit(mm)	Width-fruit(mm)	Length-seed(mm)	Width-seed(mm)	Length-fruit(mm)	Width-fruit(mm)	Length-seed(mm)	Width-seed(mm)	Length-fruit(mm)	Width-fruit(mm)	Length-seed(mm)	Width-seed(mm)	Length-fruit(mm)	Width-fruit(mm)	Length-seed(mm)	Width-seed(mm)	Length-seed(mm)	Width-seed(mm)	Length-fruit(mm)	Width-fruit(mm)	Length-fruit(mm)	Width-fruit(mm)	Length-seed(mm)
30	196.208	7.49006	55.0067	7.38909	0.593316	0.100972		30	202.8	51.073	0.594	53.467	8.97	0.097	73.6356	82.4369	83.67		13.61	7.29	7.22	3.91	13.98	7.29	8.28	4.35	14.64	9.46	8.32	5.64	15.53	8.78	9.09	5.35	14.02	9.15	8.53	6.15	17.51	10.16	8	5.36	7.87	5.87	15.73	11.09	17.56	9.54	8.38
40	305.95	15.9965	101.393	15.7396	2.93243	0.256928		30	188.533	52.797	0.569	50.867	7.915	0.08	73.0196	85.0086	85.9402		15.83	7.02	4.95	2.48	15.41	8.68	6.56	3.85	14.2	10.87	8.84	5.81	17.2	7.48	7.65	5.27	14	8.84	8.86	5.59	15.88	9.19	8.29	5.8	8.62	6.05	18.9	12.25	16.96	11.31	8.25
50	363.425	24.6436	149.548	23.733	3.69379	0.910534		30	191.033	50.467	0.486	51.533	7.453	0.065	73.024	85.2319	86.6255		14.65	7.62	7.57	4.48	13.79	8.74	7.26	4.11	15.49	9.79	7.12	4.55	14.44	8.44	8.17	5.52	13.21	9.84	8.59	5.73	14.24	12.65	8.57	5.71	8.31	5.88	14.74	9.05	14.72	9.38	8.75
60	341.852	5.74351	143.369	4.14955	5.88878	1.59396		40	292.267	82.744	2.856	74.933	13.809	0.457	74.3615	83.3112	83.9986		11.31	5.63	7.01	4.09	15.59	9.39	7.4	4.65	13.88	8.68	6.67	4.01	15.73	10.65	7.8	5.96	13.61	8.69	8.99	5.61	15.26	10.28	7.16	5.43	8.93	6	16.62	10.22	17.17	10.06	9.57
70	464.858	23.1879	162.727	21.8148	8.8795	1.37311		40	319.4	109.802	3.031	80.167	15.583	0.454	74.9008	85.8081	85.0214		13.1	7.34	5.9	3.44	14.81	7.03	6.07	3.77	13.15	9.29	7.33	4.83	17.44	10.32	7.62	4.83	16	9.57	9.09	6.03	15.68	9.89	8.9	5.97	8.11	5.67	15.23	9.96	15.62	9.43	8.89
80	537.858	24.936	141.738	22.3906	28.6155	2.54541		40	291.933	95.293	2.64	70.433	15.842	0.411	75.8736	83.3755	84.4318		11.79	6.34	6.66	3.71	13.95	8.11	7.25	4.83	14.71	7.91	7.75	4.91	16.78	9.69	7.62	5.08	15.83	10.28	8.45	5.57	12.97	9.14	9.13	6.02	7.96	6.01	15.34	9.16	13.4	8.62	7.58
90	545.422	25.5809	103.856	22.6236	49.4873	2.95729		40	320.2	117.731	3.203	78.167	17.712	0.498	75.5881	84.9555	84.4521		13.51	7.58	7.9	3.23	13.42	7.13	7.36	4.32	13.98	8.57	7.2	4.33	15.04	7.35	5.45	3.85	10.8	8.15	8.46	5.73	15.26	9.7	7.76	6.18	8.44	5.68	15.92	9.24	14.37	9.03	7.85
100	613.45	17.7106	104.998	16.4539	65.5108	1.25665		50	351.667	147.49	3.743	95.067	30.546	0.618	72.9668	79.2894	83.4892		12.97	6.63	5.61	3.23	15.04	8.17	7.15	4.21	14.82	8.14	6.45	4.79	13.35	7.49	8.21	5.47	14.27	9.67	7.41	5.01	12.16	8.48	8.48	5.53	8.19	5.54	15.63	9	17.35	9.99	8.54
110	551.742	35.254	102.123	31.8754	65.5682	3.37861		50	349.867	144.986	3.581	96.467	30.546	0.754	72.4275	78.9318	78.9444		13.02	6.8	6.68	3.7	13.91	8.51	6.51	4.8	15.86	9.18	5.81	3.94	16.27	8.4	7.42	5.58	15.53	9.29	7.97	5.39	15.05	8.84	9	5.9	8.53	6.48	15.27	9.02	15.92	9.39	8.64
120	566.992	6.5074	81.2852	5.54155	76.6815	0.96585		50	400.367	181.258	3.909	104.367	30.611	0.756	73.9322	83.1119	80.66		10.86	7.45	6.12	3.24	15.51	8.02	8.07	4.28	14.26	8.98	7.68	5.21	14.39	9.44	8.44	6.65	16.46	9.27	6	5.15	13.88	8.79	7.82	5.59	7.71	5.29	15.18	14.44	15.1	8.88	8.39
130	547.108	25.4098	77.4968	23.1424	79.5615	2.2674		50	351.8	124.458	3.542	92.8	25.015	0.754	73.6214	79.9009	78.7126		15.9	7.36	6.14	4.5	14.21	8.16	7.85	4.53	16.1	8.48	7.73	5.03	15.6	8.24	9.01	6.22	16.76	10.26	8.5	6.42	15.01	10.06	8.58	5.37	9.01	5.92	17.28	8.53	16.9	10.02	9.78
140	468.117	15.6678	73.7236	12.0985	93.868	3.56928		60	335.469	144.412	5.532	98.625	39.831	1.756	70.6009	72.4185	68.2574		12.37	6.93	6.12	3.33	14.54	7.09	7	3.98	13.49	9.43	6.78	4.44	14.78	7.45	8.99	6.41	14.68	9.67	7.94	5.82	17.13	9.58	7.23	5.55	7.91	5.82	12.54	9.32	14.66	9.44	8.34
DM	Pericarp	SD	Seed coat	SD	Kernel	SD		60	347.563	147.395	6.536	115.531	42.744	1.936	66.7597	71.0004	70.3794		11.66	6.31	6.86	4.35	12.29	8.2	8.06	6.12	16.13	8.44	6.8	4.06	12.16	8.31	7.65	5.4	13.68	10.09	7.9	6.39	14.82	9.46	7.01	5.1	7.63	5.27	15.91	9.27	16.21	10.23	8.3
30	52.7	1.85273	8.41224	0.657025	0.0907366	0.0203204		60	345.75	144.641	4.859	113.625	39.744	1.332	67.1367	72.5223	72.587		15.57	8.23	5.83	4.35	13.3	7.73	7.27	4.91	15.88	9.05	6.14	6.48	15.53	9.71	9.6	5.4	15.6	9.39	8.44	6.31	14.56	8.62	8.15	5.29	8.87	5.99	15.51	9.06	14.67	9.45	8.91
40	75.925	4.24887	15.7451	1.13991	0.455373	0.035255		60	338.625	137.028	6.628	112.438	40.916	1.681	66.7957	70.1404	74.6379		13.7	8.02	5.71	3.12	15.22	8.12	6.27	3.71	13.83	7.89	7.81	5.12	16.32	10.48	8.58	6.33	10.85	8.93	8.73	6.1	14	8.84	9.23	6.19	7.69	5.61	17.48	8.56	16.96	11.21	7.84
50	97.175	5.02684	29.192	2.05764	0.721035	0.310417		70	445.167	165.502	9.031	143.633	66.43	3.803	67.735	59.8615	57.8895		10.61	7.08	7.15	3.84	13.62	8.8	5.57	4.15	12.91	8.47	7.87	4.88	14.44	8.44	9.45	5.73	14.2	9.7	7.62	5.73	13.07	9.59	9.06	5	8.1	5.87	16.39	9.08	15.48	8.32	8.55
60	110.055	7.72562	40.8137	2.01774	1.67639	0.721888		70	474.733	196.192	9.341	152.6	75.1	4.3	67.8556	61.7212	53.9664		11.68	5.43	5.67	4.15	16	10	6.81	4.15	14.88	8.6	7.98	5.2	17.01	7.75	8.29	5.25	15.97	8.06	8.5	6.21	14.8	10.48	8.01	5.52	8.5	5.91	16.68	9.95	13.32	10.05	8.46
70	149.267	6.50601	69.5275	2.98128	3.98082	1.27769		70	493	140.597	10.036	156.8	66.714	4.00023	68.1947	52.5495	60.1412		10.79	6.52	5.85	2.64	13.01	8.07	7.15	4.34	15.74	8.54	8.74	5.7	14.54	7.82	7.4	5.22	14.55	9.17	8.64	6.05	15.93	10.1	7.66	5.66	8.55	5.56	14.15	8.23	16.59	9.44	9.38
80	156.142	7.47823	69.0726	2.43814	15.4524	1.90206		70	446.533	160.571	7.762	144.033	69.866	3.82	67.7442	56.489	50.7859		12.99	6.61	6.44	3.68	14.28	8.7	8.18	5.56	13.34	9.1	8.53	5.7	12.78	9.49	8.09	4.65	14.4	8.52	8.92	7.13	13.6	8.69	7.41	5.59	6.7	5.68	12.77	8.76	15.72	9.12	7.89
90	164.969	7.73882	59.0008	3.11886	27.6867	1.33665		80	548.467	161.777	28.623	158.8	70.714	15.82	71.0466	56.2892	44.7298		12.16	7.12	6.72	3.01	12.09	6.04	6.91	3.91	13.31	7.88	8.01	5.8	14.17	8.19	6.68	4.5	15.82	9.43	8.86	6.44	14.33	9.57	7.5	5.77	8.07	5.15	16.5	10.35	17.46	9.53	8.39
100	170.417	18.4356	61.3988	1.61561	40.0262	0.692405		80	510.633	142.735	27.798	147.633	64.857	14.509	71.0882	54.5612	47.8056		11.02	6.43	6.45	3.25	14.54	8.41	6.79	4.19	13.61	7.9	7.78	5.28	13.5	6.99	8.4	6.01	15.3	8.84	8.46	5.66	13.93	8.53	9.52	6.18	8.53	5.35	14.8	9.62	15.92	9.85	7.62
110	168.575	8.98115	62.501	1.62252	47.749	2.12394		80	567.067	128.183	29.917	165.033	73.002	16.331	70.8971	43.0486	45.4123		12.41	6.8	6.17	3.67	13.28	7.42	7.35	4.19	15.71	7.19	7.35	4.43	14	8.75	8.05	5.21	15.63	10.33	7.56	5.57	14.93	9.61	8.46	5.76	8.19	5.85	12.8	8.78	18.74	10.41	8.58
120	165.858	2.2358	54.4071	0.606897	54.9595	1.68867		80	525.267	124.677	26.19	153.1	67.717	15.149	70.8529	45.6861	42.1573		11.75	5.36	6.79	3.57	15.33	7.71	7.79	4.4	12.4	9.28	7.93	4.96	13.47	9.14	7.42	5.56	14.51	9.28	9.38	6.5	13.7	8.52	8.46	5.81	8.89	5.56	16.01	9.54	14.28	9.56	8.21
130	166.167	5.78792	52.9534	2.44957	58.9633	2.47839		90	524.875	120.788	47.025	158.938	62.446	26.848	69.7189	48.3012	42.907		10.92	5.36	5.7	3.09	12.21	7.47	8.16	6.46	15.88	8.79	8.44	5.4	12.15	8.26	7.43	4.62	15.08	10.01	8	6.12	13.53	8.47	7.51	5.27	9.16	5.27	16.17	10.37	17.58	9.8	8.25
140	182.233	5.40761	59.3007	1.69757	68.6493	2.1561		90	582.5	97.899	52.414	176.313	57.214	29.304	69.7317	41.5581	44.0913		11.15	6.7	6.13	3.29	14.68	6.89	7.02	4.5	15.95	8.18	8.23	4.92	13.8	9.89	6.09	3.69	14.39	9.32	8.65	6.62	14.06	8.37	7.59	5.45	8.25	5.01	17.07	8.96	17.15	9.15	8.52
Water content	Pericarp	SD	Seed coat	SD	Kernel	SD		90	533.313	89.348	47.339	162.813	55.81	26.19	69.4714	37.5364	44.6756		13.25	8.02	6.62	2.94	13.26	8.38	7.23	3.61	14.97	7.61	7.25	4.84	12.56	8.07	7.41	5.86	13.75	9.3	8.61	6.53	12.37	8.54	7.63	5.39	7.97	5.46	18.15	9.37	14.24	10.16	7.39
30	73.1369	0.340429	84.7069	0.197641	84.7069	0.142788		90	541	107.391	51.171	161.813	60.532	28.405	70.09	43.634	44.49		13.05	6.82	6.26	3.27	14.48	8.49	6.62	4.16	13.9	7.44	7.56	4.65	12.61	8.14	10.16	5.55	14.59	9.23	8.17	6.65	16.56	9.38	8.33	5.57	8.55	5.68	16.64	8.32	16.35	10.29	8.55
40	75.181	0.682079	84.4712	0.244499	84.4712	0.43758		100	601.267	103.74	65.726	173.067	60.778	39.622	71.2163	41.4131	39.7164		12.59	6.63	6.21	3.81	13.11	6.98	7.69	4.2	13.18	8.4	8.1	5.24	13.97	8.67	7.82	5.8	19.34	10.52	7.74	5.37	14.02	8.57	8.32	5.37	8.37	5.73	14.25	9.72	15.17	9.68	8.76
50	73.237	0.673108	80.4798	0.647564	80.4798	1.32067		100	639.6	108.543	66.723	187.7	61.606	41.227	70.6535	43.2428	38.2117		11.43	6.08	5.14	2.68	12.13	8.41	7.07	4.9	13.32	9.48	7.75	4.93	13.98	7.5	7.31	3.77	15.29	10.39	8.08	5.54	16.57	10.77	9.48	6.03	8.24	5.96	13.7	9.51	16.66	10.37	8.22
60	67.8232	1.85951	71.5324	0.0687404	71.5324	1.92825		100	608.833	95.591	64.009	176.5	59.971	39.096	71.0101	37.2629	38.9211		13.65	6.71	6.72	3.43	14.17	7.31	7.54	4.05	14.64	7.51	8.25	5.43	13.82	7.04	7.94	6.25	13.4	8.08	8.56	6.58	12.94	8.89	7.95	5.1	7.76	5.67	14.3	10.59	16.71	10.36	8.4
70	67.8823	0.215358	56.1968	1.33602	55.1684	1.55138		100	604.1	112.116	65.584	144.4	63.24	40.161	76.0967	43.5941	38.764		12.38	6.49	6.25	3.33	12.42	7.36	7.08	3.84	13.31	8.19	6.5	4.68	13.54	9.51	9.14	6.19	13.14	8.67	8.44	6.54	15.95	9.74	9.81	6.41	8.79	6.48	15	9.57	18.13	9.29	8.14
80	70.9712	0.113818	51.2672	0.528705	46	0.642523		110	596.533	114.159	66.875	165.833	64.438	46.847	72.2005	43.5542	29.9484		11.83	7.34	6.71	3.53	13.01	7.71	7.52	4.45	13.61	9.46	8.79	5.35	14.82	7.54	8.61	5.49	11.17	8.43	7.83	5.95	14.87	9.03	7.38	4.73	8.01	6.56	12.94	9.08	17.15	9.37	8.95
90	69.7531	0.254634	43.19	0.501768	44.0529	0.756402		110	562.9	91.276	67.024	177.1	61.32	49.229	68.5379	32.8191	26.5502		12.8	5.88	5.87	3.02	14.6	7.97	6.55	3.93	14.56	6.77	7.89	5.59	14.92	7.25	6.96	5.65	14.22	9.49	8.13	6.08	14.75	9.62	6.9	5.34	8.06	5.8	18.28	11.63	14.38	9.33	10.2
100	72.2442	2.57884	41.5236	2.4174	38.9013	0.161438		110	527.8	88.535	61.265	157.167	60.111	45.923	70.2222	32.1048	25.042		12.46	6.76	5.48	2.8	13.94	7.8	6.48	3.92	12.26	7.97	8.37	4.83	17.24	10.72	8.98	6.2	12.26	7.49	8.68	6.39	14.52	9.08	8.58	5.72	8.04	5.46	14.33	8.32	14.6	8.8	9.17
110	69.3609	2.43351	38.7986	0.34221	27.1765	2.0913		110	519.733	114.524	67.109	174.2	64.136	48.998	66.4828	43.9978	26.9874		15.38	8.08	6.88	3.9	13.26	7.28	7.58	4.26	13.38	9.47	7.9	5.3	11.03	6.9	8.31	5.8	13.9	9.35	9.75	5.96	15.62	10.58	7.88	5.39	8.85	5.34	16.1	9.56	17.06	9.91	8.73
120	70.7478	0.173757	33.0664	2.36743	28.3275	2.19368		120	575.333	86.241	77.526	168.633	55.452	53.67	70.6895	35.7011	30.7716		12.05	6.16	4.64	2.48	11.23	7.15	7.44	4.64	13.69	8.27	7.49	4.38	12.63	8.65	8.18	6.47	14.51	9.79	8.27	5.72	15.59	9.61	8.19	5.71	7.95	5.48	15.5	9.28	15.23	10.04	6.97
130	69.6138	0.526404	31.6703	2.1234	25.8897	1.59699		120	566.5	80.925	76.342	166.667	55.286	56.015	70.5795	31.6824	26.6262		14.18	6.78	6.45	2.76	12.64	7.98	7.62	4.71	16.5	8.29	7.9	4.41	13.03	7.86	7.84	5.47	14.81	8.96	8.2	6.05	14.9	9.58	6.83	5.17	8.54	9.51	12.25	10.06	15.62	9.41	7.44
140	61.0524	1.24337	19.5635	2.77609	26.8662	1.53272		120	566.7	76.261	75.772	164.4	53.76	54.306	70.9899	29.5053	28.3297		13.97	7.62	6.29	3.34	15.53	8.55	7.11	4.94	16.65	9.13	8.39	5.32	14.49	9.31	9.08	6.48	12.27	7.98	8.62	5.67	13.29	8.17	8.46	5.84	8.75	5.61	15.7	9.84	17.91	10.36	9.4
Length	Fruit	SD	Seed	SD				120	559.433	81.714	77.086	163.733	53.13	55.847	70.7323	34.9805	27.5523		13.77	6.52	4.89	2.37	13.4	9.07	8.05	4.9	13.7	9.68	7.74	4.59	15.98	9.99	7.86	5.41	17.72	9.25	8.27	6.27	14.07	9.2	6.54	5.35	8.52	5.48	14.48	8.59	15.02	9.65	8.29
30	12.6898	1.36898	6.2286	0.673441				130	513.5	71.448	75.352	158.967	49.46	55.073	69.0425	30.7748	26.9124		11.32	6.04	6.47	3.89	12.42	7.95	8.04	4.68	15.16	9.08	7.07	4.72	13.55	8.22	7.59	5.32	14.65	8.4	8.08	5.91	13.29	9.25	8.89	6.04	8.64	6.08	15.28	9.24	18.1	10.25	8.16
40	13.9428	1.16935	7.236	0.652721				130	546.667	79.475	79.592	167.767	54.002	60.131	69.3109	32.0516	24.4509		13.91	5.79	7.22	3.96	14.01	7.69	6.81	5.6	13.26	7.36	7.93	5.63	16.83	8.92	8.8	5.73	14.26	9.4	8.75	6.6	15.93	8.27	8.05	6.18	8.4	5.46	15.37	9.02	17.94	9.15	8.58
50	14.4626	1.28278	7.622	0.752094				130	553.467	78.57	80.663	165.067	54.27	60.43	70.1758	30.9278	25.0834		13.86	6.01	5.78	3.63	14.93	7.89	9.26	5.64	12.33	8.35	5.59	3.5	14.11	8.49	7.92	5.78	16.34	8.55	8.45	6.1	14.19	10.07	7.97	5.55	8.4	5.32	15.51	8.86	13.37	9.15	9
60	14.474	1.61319	8.1626	0.899689				130	574.8	78.521	80.613	172.867	54.081	60.219	69.9257	31.1254	25.2986		11.27	6.51	5.95	3.64	15.94	7.95	6.39	3.66	15.03	6.75	7.37	5.14	16.73	10.32	8.49	6.27	16.88	10.98	8.65	5.89	14.04	10.11	7.08	5.37	7.76	5.66	15.55	9.96	15.24	9.25	8.5
70	14.4776	1.70917	8.3606	0.559188				140	472.467	77.971	97.729	189.667	61.332	71.001	59.856	21.34	27.3491		11.17	5.68	5.51	2.94	12.82	7.89	6.91	5.08	14.73	7.91	7.88	5.56	13.99	8.68	9.23	5.55	14.14	8.61	8.51	7.19	15.33	9.49	8.55	5.6	7.56	5.32	16.05	10.44	17.72	9.21	8.2
80	14.5308	1.20806	8.122	0.742243				140	453.1	72.153	94.414	179.833	60.112	69.588	60.3105	16.6881	26.2948		13.54	7.33	6.53	3.2	13.34	8.43	6.82	4.3	14.19	8.82	7.8	4.67	13.53	9.32	7.37	5.3	13.76	9.43	8.57	6.08	15.35	8.81	7.92	5.78	8.21	5.54	17.23	10.08	14.1	9.94	8.16
90	15.4284	1.49642	8.2664	0.504238				140	488.2	71.557	90.11	182.367	57.269	66.297	62.645	19.9673	26.4266		11.96	6.02	6.2	3.03	15.59	8.22	7.54	4.18	14.28	8.41	7.98	4.86	17.6	10.39	8.61	5.85	13.3	8.43	8.33	5.76	13.49	8.94	8.46	5.5	7.62	4.92	15.6	8.26	13.23	8.7	9.28
100	15.9174	1.46254	8.474	0.619654				140	458.7	73.214	93.219	177.067	58.49	67.71	61.3981	20.1109	27.3646		13.03	6.44	6.33	3.13	12.71	6.35	7.24	3.91	13.95	8.1	6.19	4.56	12.65	8.52	8.26	5.8	14.38	9.02	7.96	6.06	13.57	9.36	7.25	5.08	9.61	6.7	14.22	8.95	13.98	10.15	8.71
110	16.1242	1.42051	8.586	0.625962															11.93	7.14	6.63	3.32	13.84	7.17	6.62	4.25	14.07	9.95	8.16	5.59	14.57	7.45	9.25	6.45	14.19	9.5	8.32	6.36	12.44	8.15	8.24	5.81	8.53	5.86	15.23	10.2	15.58	9.97	8.14
120	16.1795	1.03776	8.6482	0.67933															13.37	5.41	5.65	3.01	15.54	8.46	7.11	3.52	15.58	7.78	7.71	4.59	12.52	8.91	9.18	5.63	10.34	7.84	8.54	5.74	13.9	8.57	8.25	5.86	7.85	5.32	12.65	9.57	16.94	9.4	7.62
130	16.207	1.13885	8.59531	0.577332															11.01	6.03	5.4	2.69	14.81	8.27	7.39	3.35	18.73	8.27	8.25	4.63	12.58	8.47	9.23	4.93	16.12	9.74	8.07	5.86	13.7	8.76	8.66	5.8	7.62	5.81	16.49	8.68	15.63	9.45	8.88
140	16.198	0.817077	8.68209	0.290887
Width	Fruit	SD	Seed	SD
30	6.685	0.74369	3.389	0.528954
40	7.9318	0.737051	4.419	0.639142
50	8.5308	0.834911	4.9682	0.565471
60	8.6358	1.04116	5.5352	0.674544
70	9.2116	0.750277	6.0376	0.454917
80	9.323	0.822962	5.614	0.349891
90	9.5702	1.08801	5.77	0.656077
100	9.657	0.599252	5.815	0.473779
110	9.8746	0.989381	5.7872	0.6095
120	9.92992	1.2443	5.8494	0.434906
130	9.95737	0.853853	5.79651	0.452882
140	9.94839	0.692766	5.88329	0.28482
Volumes	Fruit	SD	Seed	SD
30	296.781	91.0711	37.4379	14.497
40	459.063	109.392	73.9477	28.9574
50	550.813	114.407	98.4567	27.7925
60	564.901	185.877	130.88	38.4595
70	642.902	162.616	159.494	29.9238
80	660.966	155.211	133.963	26.7569
90	739.505	224.364	144.028	44.1375
100	776.846	140.686	149.957	34.8892
110	822.802	221.25	150.49	42.1899
120	834.902	252.258	154.856	40.3461
130	840.949	130.356	151.138	37.1813
140	838.967	61.5653	157.269	19.8794
Surface area	Fruit	SD	Seed	SD
30	224.355	44.1247	56.2089	13.8354
40	297.354	45.6986	87.375	20.4409
50	334.441	44.3338	105.104	19.8009
60	339.713	70.3628	126.648	25.4544
70	367.984	62.4812	143.821	17.831
80	374.56	56.4262	128.437	17.1072
90	404.95	73.799	134.693	23.5769
100	419.385	50.9238	138.544	20.5153
110	435.359	63.4652	139.07	23.668
120	439.523	69.1779	141.707	17.1451
130	441.596	44.7786	139.463	16.002
140	440.917	26.9958	143.154	8.42517
[truncated: 17 more columns]

## Sheet: Carbohydrate  content
Means and standard deviations								DAF	Total soluble suagar-pericarp(mg)	Starch-pericarp(mg)	Total soluble suagar-seed coat(mg)	Starch-seed coat(mg)	Total soluble suagar-kernel(mg)	Starch-kernel(mg)	Sucrose-pericarp(mg/g)	Glucrose-pericarp(mg/g)	Fructose-pericarp(mg/g)	Sucrose-seed coat(mg/g)	Glucrose-seed coat(mg/g)	Fructose-seed coat(mg/g)
Total solugar content	Pericarp	SD	Seed coat	SD	Kernel	SD		30	9.26586	4.72799	3.34515	0.426413	0.065184	0.00210053	28.1315	1.05279	20.5134	12.9181	0.35618	2.63676
30	8.85432	0.399652	3.4156	0.0587068	0.0721464	0.0738644		30	8.82938	4.85062	3.48605	0.536389	0.0714163	0.00223211	23.8237	0.970378	15.8119	13.032	0.365668	3.64893
40	13.6943	1.60043	5.64179	0.345046	0.358093	0.24909		30	8.46772	5.06661	3.4156	0.481401	0.0798389	0.0017632	25.9776	1.01159	18.1627	16.0325	0.368653	3.64151
50	19.5752	1.05239	7.80944	0.193905	0.697258	0.800498		40	12.5232	5.54411	5.22773	0.527405	0.381409	0.00754392	27.0676	0.903914	13.6017	16.0992	0.344997	4.03277
60	18.6715	0.98449	8.36659	0.567629	1.20305	0.785435		40	15.5179	6.21029	6.05584	0.673906	0.333091	0.007	30.4162	0.954426	13.0154	17.0571	0.368009	4.73993
70	26.5652	0.926057	8.5349	0.605055	1.79941	1.21855		40	13.0418	6.51624	5.64179	0.600655	0.35978	0.0083125	28.7419	0.92917	13.3086	20.7614	0.356413	3.94428
80	20.0709	2.98749	10.0911	1.12497	4.53314	1.6916		50	19.7651	8.06569	7.57675	0.964322	0.788855	0.00756631	29.0101	1.01107	17.3491	21.5675	0.319962	5.01308
90	28.6732	1.03964	3.454	0.181254	6.18067	0.928095		50	18.4407	7.8151	8.04213	1.09246	0.640716	0.00939831	27.3607	1.01066	17.0173	22.4135	0.321528	5.72031
100	29.819	5.01786	1.71411	0.00695164	7.48987	0.334724		50	20.5197	6.57389	7.80944	1.02839	0.662202	0.00941321	28.0269	0.990691	16.9374	23.6755	0.38102	5.38354
110	32.3642	2.16357	1.13136	0.0265045	7.08817	0.469648		60	19.1278	9.9261	7.68543	1.39515	1.2923	0.00688607	28.0879	0.83169	17.3332	21.1179	0.358742	5.27557
120	39.1769	3.93326	0.916008	0.0607056	8.63271	0.152423		60	19.345	9.33613	9.04774	1.99927	1.17236	0.0102341	26.4746	0.844976	14.2205	25.7287	0.406173	5.99047
130	41.6861	5.29126	0.8546	0.061981	9.53922	0.105788		60	17.5416	11.3362	8.36659	1.69721	1.14448	0.00945054	27.2812	0.838333	15.7768	29.7213	0.369243	5.91896
140	36.0377	1.70095	0.320042	0.00585728	11.9983	0.163835		70	26.5915	13.9139	7.80883	4.70082	1.66361	0.0170787	31.0701	1.07007	19.8432	25.1316	0.407753	5.05317
Total starch content	Pericarp	SD	Seed coat	SD	Kernel	SD		70	27.4779	15.9064	9.26096	7.12149	1.8354	0.0132118	29.3907	1.05096	18.9872	21.9272	0.486561	4.57984
30	4.88174	0.17144	0.481401	0.0549882	0.00203195	0.000241862		70	25.6263	20.0564	8.5349	5.91116	1.89921	0.0112426	26.8307	1.03001	18.8276	25.4357	0.363555	5.85734
40	6.09021	0.497065	0.600655	0.0732506	0.00761881	0.000659447		80	16.6713	13.2339	8.74119	6.29151	4.83601	0.0646156	18.173	0.658975	9.75142	27.8706	0.324142	6.01716
50	7.48489	0.79884	1.02839	0.0640704	0.00879261	0.00106203		80	21.2636	12.6267	11.4411	3.88111	3.88817	0.0686541	19.7339	0.690861	13.5963	33.0544	0.488866	6.69291
60	10.1995	1.0277	1.69721	0.302058	0.00921024	0.00175119		80	22.2778	13.6286	10.0911	5.08631	4.87524	0.0726926	18.9534	0.674918	11.6739	30.4625	0.406504	5.90503
70	16.6256	3.13376	5.91116	0.884883	0.0133317	0.00296903		90	29.4435	14.9001	3.23649	2.69901	6.42294	0.363372	23.0476	1.01872	13.2235	14.0721	0.231638	4.55387
80	13.1631	0.504732	5.08631	0.921723	0.0686541	0.00403848		90	29.0853	10.4312	3.6715	2.12843	6.20308	0.290139	20.5187	1.14606	13.8773	16.8377	0.314627	5.65144
90	12.2309	2.35793	2.41372	0.285291	0.251108	0.0461977		90	27.4906	11.3615	3.454	2.41372	5.91598	0.277967	21.7831	1.08239	13.5504	15.4549	0.273132	5.10266
100	10.7651	1.17054	2.70009	0.355637	0.410939	0.0373334		100	34.3636	9.88446	1.70577	3.05572	7.47478	0.453821	26.7362	0.875466	11.8671	7.10114	0.226824	6.97198
110	10.3414	1.13135	2.32866	0.125595	0.650394	0.0597897		100	30.6595	10.3173	1.72245	2.34445	7.46918	0.385668	32.2997	0.82506	11.6077	8.61389	0.187692	6.06863
120	9.51769	2.79353	2.05425	0.208129	1.0924	0.0865693		100	24.434	12.0934	1.71411	2.70009	7.52565	0.393329	29.518	0.850263	11.7374	6.35752	0.207258	6.5203
130	14.3557	2.19238	2.01906	0.26913	1.11322	0.119546		110	31.842	9.1816	1.09956	2.45426	7.25674	0.679212	21.4082	1.1967	15.8687	4.31915	0.110247	4.94502
140	14.8778	2.53197	2.33025	0.218867	1.74741	0.154292		110	30.5094	10.4008	1.16317	2.20307	7.06788	0.581653	25.3672	1.11216	12.1292	3.17686	0.177293	5.74648
Glucose content	Pericarp	SD	Seed coat	SD				110	34.741	11.442	1.13136	2.32866	6.93989	0.690317	23.3877	1.15443	13.9989	2.15969	0.133298	5.04358
30	1.01159	0.0412078	0.36222	0.00965774				120	40.3141	12.739	0.988855	2.26238	8.88138	1.03489	26.2653	1.11216	16.8549	4.32925	0.156345	7.05234
40	0.92917	0.0252564	0.351222	0.0173512				120	34.8003	7.76184	0.843161	1.84612	8.4611	1.05035	24.687	1.22047	14.6798	5.2225	0.196169	6.55183
50	1.00367	0.0118462	0.345564	0.0308036				120	42.4163	8.0522	0.916008	2.05425	8.55566	1.19196	25.4762	1.16632	15.7674	6.52627	0.172371	8.95266
60	0.838333	0.00664289	0.378243	0.0285714				130	33.1742	16.0426	0.928977	2.28819	9.2895	1.20561	27.2625	1.11031	15.6771	3.11678	0.178188	5.33647
70	1.06	0.0141421	0.412356	0.0866071				130	53.7835	15.147	0.780222	1.74993	9.62322	0.9557	25.6251	1.08031	14.6171	4.45678	0.160118	6.9352
80	0.674918	0.0159429	0.406504	0.074539				130	38.1005	11.8775	0.8546	2.01906	9.70494	1.41703	23.2625	1.05131	13.6971	5.35646	0.159818	7.93334
90	1.08239	0.0636702	0.273132	0.0204982				140	34.3451	17.7488	0.313013	2.54911	11.9748	1.83837	31.4016	1.33957	19.3842	0.790922	0.131969	2.10567
100	0.850263	0.0252028	0.207258	0.0318859				140	37.7469	13.9208	0.327071	2.11138	11.7777	1.83459	28.1557	1.23057	18.5842	2.56991	0.101497	2.90901
110	1.15443	0.0422674	0.140298	0.0514801				140	36.0212	12.9638	0.320042	2.33025	12.2425	1.56926	33.9916	1.13574	17.34	1.99386	0.161941	3.90353
120	1.16632	0.0541551	0.176169	0.0230502					0
130	1.08065	0.0295014	0.166118	0.0100901					0
140	1.2353	0.101997	0.131941	0.03987					0
Fructose content	Pericarp	SD	Seed coat	SD					0
30	18.1627	2.35072	3.36984	0.520387					0
40	13.3086	0.293164	4.22542	0.388988					0
50	17.1013	0.218307	5.37458	0.42619					0
60	15.7768	1.55634	5.73528	0.379762					0
70	19.2194	0.546142	5.16984	0.522024					0
80	11.6739	1.92245	6.20503	0.626251					0
90	13.5504	0.326939	5.10266	0.829282					0
100	11.7374	0.129695	6.5203	0.505576					0
110	13.9989	1.86976	5.21676	0.919792					0
120	15.7674	1.08754	7.50901	1.76205					0
130	14.6638	0.990825	6.7841	1.58586					0
140	18.4361	1.03012	2.95067	1.17558					0
Sucrose content	Pericarp	SD	Seed coat	SD					0
30	25.9776	2.1539	13.9697	1.89732					0
40	28.7419	1.67428	17.9626	2.32812					0
50	28.13	0.830482	22.5476	1.21513					0
60	27.2812	0.806621	25.575	4.03549					0	0	0	0	0	0
70	29.0967	2.13517	24.1637	2.08214					0	0	0	0	0	0
80	18.9534	0.780461	30.4625	2.30645					0	0	0	0	0	0
90	21.7831	1.26443	15.4549	1.02614					0	0	0	0	0	0
100	29.518	2.78175	7.35752	1.89991					0	0	0	0	0	0
110	23.3877	1.97949	3.21915	1.45759					0	0	0	0	0	0
120	25.4762	0.789181	5.35966	1.09821					0	0	0	0	0	0
130	25.3834	2.01093	4.31678	1.43973					0	0	0	0	0	0
140	31.1829	2.92408	1.78386	1.16786

## Sheet: Amino acid and soluble protein
Means and standard deviations								DAF	Amino acid-pericarp(ug)	Amino acid-seed coat(ug)	Amino acid-kernel(ug)	Protein-pericarp(mg)	Protein-seed coat(mg)	Protein-kernel(mg)
Amino acid content	Pericarp	SD	Seed coat	SD	Kernel	SD		30	11.1614	2.52025	0.0622333	0.244069	2.95006	0.0318351
30	15.154	3.49143	2.99457	0.474318	0.0584179	0.003818		30	16.6663	3.46889	0.0545973	0.254545	2.77489	0.0323728
40	20.016	0.328132	6.18534	2.00958	0.330221	0.0622717		30	17.6343	2.99457	0.0584153	0.23517	2.86248	0.0306459
50	27.9078	6.5482	8.68032	1.25104	0.399336	0.00950782		40	20.3442	4.17576	0.392501	0.418387	3.32845	0.162357
60	51.769	7.18607	12.8423	3.06297	0.960636	0.107999		40	19.6879	8.19492	0.267957	0.348455	4.55965	0.14488
70	45.0699	1.19655	17.9063	7.97928	2.0342	0.0857094		40	20.016	6.18534	0.330229	0.354847	3.94405	0.170421
80	48.3603	6.53431	20.9049	2.99163	9.11375	1.07415		50	34.456	7.42928	0.408836	0.425467	5.97746	0.187988
90	63.4493	11.8633	6.20198	0.0534654	8.01446	0.647517		50	21.3596	9.93136	0.389821	0.434682	6.76971	0.161603
100	58.0291	11.6265	2.58102	0.202698	11.7192	1.70564		50	27.9078	8.68032	0.399329	0.459603	6.37359	0.199531
110	29.9422	1.30184	5.84877	0.0920031	12.2363	1.40588		60	44.583	9.77936	1.06862	0.406986	4.90698	0.577573
120	38.3102	0.851339	3.13842	0.732299	7.96414	0.996761		60	58.9551	15.9053	0.852622	0.448436	5.98224	0.471365
130	31.5293	8.16214	3.9297	1.07718	8.77563	1.15707		60	51.769	12.8423	0.960621	0.448924	5.44461	0.332558
140	16.8289	1.27281	2.53336	0.559806	11.2304	2.31106		70	43.8734	25.8855	1.94846	0.610708	9.20667	0.85148
Protein content	Pericarp	SD	Seed coat	SD	Kernel	SD		70	46.2665	9.92698	2.11988	0.644908	7.78281	0.650502
30	0.244595	0.00969847	2.86248	0.087585	0.0316179	0.000883737		70	45.0699	17.9063	2.03417	0.627808	8.49474	0.755947
40	0.373896	0.038662	3.94405	0.615598	0.15922	0.0130563		80	41.0166	17.9133	8.54247	0.815336	10.0271	3.13621
50	0.439917	0.0176599	6.37359	0.396124	0.260379	0.0453712		80	53.532	23.8966	10.3528	0.707764	7.5045	3.63187
60	0.434782	0.0240731	5.44461	0.537634	0.460499	0.0402231		80	50.5324	20.9049	8.44593	0.70325	8.7658	2.41571
70	0.627808	0.0171001	8.49474	0.711931	0.821354	0.0701244		90	71.5998	6.25545	8.66186	0.633663	2.04344	6.40904
80	0.742116	0.0634498	8.7658	1.2613	2.81109	0.053414		90	49.8391	6.14852	7.36683	0.618275	1.57237	6.30079
90	0.627365	0.00806533	1.80791	0.235532	6.35676	0.0542205		90	68.9089	6.20198	8.01435	0.630157	1.80791	6.36044
100	0.705577	0.0426365	0.94654	0.0509363	8.44914	0.984392		100	44.739	2.78372	9.35869	0.751914	0.895604	6.55693
110	0.701829	0.0469266	0.196056	0.00986282	8.69559	1.03392		100	66.3189	2.37832	14.0802	0.668003	0.997477	9.34406
120	0.739924	0.0305141	0.143229	0.00710036	13.0404	1.44955		100	63.0293	2.58102	11.7194	0.696813	0.94654	9.44642
130	0.81695	0.0691077	0.122899	0.0101369	14.256	1.38195		110	31.2441	5.94077	14.9533	0.747117	0.205919	9.36981
140	0.604428	0.068456	0.0989345	0.00210639	16.7929	1.77791		110	28.6404	5.75677	9.51878	0.704949	0.186193	9.21175
								110	29.9422	5.84877	12.236	0.65342	0.196056	7.50522
								120	39.1616	2.40612	6.96746	0.722408	0.136128	11.4475
								120	37.4589	3.87072	8.96098	0.775159	0.150329	14.2819
								120	38.3102	3.13842	7.96422	0.722206	0.143229	13.3919
								130	34.5023	5.00687	9.93239	0.89247	0.112763	15.4328
								130	22.2974	2.85252	7.61824	0.756866	0.133036	11.1066
								130	37.7883	3.9297	8.77532	0.801514	0.122899	18.6153
								140	18.0138	3.09317	16.3574	0.662552	0.0968281	18.2959
								140	15.4834	1.97355	9.85795	0.621759	0.101041	17.2524
								140	16.9896	2.53336	13.1077	0.528972	0.0989345	14.8303

## Sheet: Chlorophyll
Means and standard deviations						DAF	Chl a-pericarp(mg)	Chl b-pericarp(mg)	Chl a-seed coat(mg)	Chl b-seed coat(mg)
Chl a	Pericarp	SD	Seed coat	SD		30	0.035212	0.00995126	0.00480916	0.0013762
30	0.0327971	0.00241497	0.00469338	0.000115779		30	0.0303821	0.0100983	0.0045776	0.00135608
40	0.0426409	0.000360669	0.00910642	0.00266185		30	0.0327971	0.0100248	0.00469338	0.00136614
50	0.0455893	0.0018808	0.011856	0.00102905		40	0.0422802	0.0141594	0.0117683	0.00429897
60	0.0394092	0.000180968	0.00781546	0.000296272		40	0.0430016	0.0140364	0.00644456	0.00190131
70	0.049907	0.00013976	0.00811457	0.000244782		40	0.0426409	0.0140979	0.00910642	0.00310014
80	0.0654143	0.00104658	0.00636987	0.000941713		50	0.0437085	0.0154005	0.0128851	0.00516292
90	0.0461644	0.00191755	0.00830538	5.18958e-05		50	0.0474701	0.0139198	0.010827	0.00276779
100	0.0649172	0.00567943	0.0100072	1.70621e-07		50	0.0455893	0.0146601	0.011856	0.00396536
110	0.0657109	0.000618999	0.00907855	0.000983953		60	0.0392283	0.0130579	0.00751919	0.00197996
120	0.0578257	0.000491483	0.00454182	2.8907e-06		60	0.0395902	0.0146924	0.00811173	0.00231129
130	0.044491	0.00382447	0.0039317	0.000255449		60	0.0394092	0.0138751	0.00781546	0.00214563
140	0.0347134	0.00410137	0.00286836	0.000279302		70	0.0500468	0.0181886	0.00835935	0.00373788
Chl b	Pericarp	SD	Seed coat	SD		70	0.0497673	0.0180832	0.00786979	0.00222485
30	0.0100248	7.3534e-05	0.00136614	1.00593e-05		70	0.049907	0.0181359	0.00811457	0.00298136
40	0.0140979	6.15112e-05	0.00310014	0.00119883		80	0.0664609	0.0169593	0.00542816	0.00180368
50	0.0146601	0.000740333	0.00396536	0.00119756		80	0.0643677	0.0197605	0.00731159	0.00208003
60	0.0138751	0.000817239	0.00214563	0.000165663		80	0.0654143	0.0183599	0.00636987	0.00194186
70	0.0181359	5.26684e-05	0.00298136	0.000756518		90	0.0442469	0.0171105	0.00835728	0.00391705
80	0.0183599	0.00140057	0.00194186	0.000138176		90	0.048082	0.0172897	0.00825349	0.00466635
90	0.0172001	8.96264e-05	0.0042917	0.000374649		90	0.0461644	0.0172001	0.00830538	0.0042917
100	0.0194331	0.00432343	0.00562876	0.000948836		100	0.0705966	0.0237565	0.0100074	0.0065776
110	0.0215269	0.000909243	0.00497483	0.000602286		100	0.0592378	0.0151097	0.0100071	0.00467992
120	0.0196373	0.00033539	0.00158751	0.000234802		100	0.0649172	0.0194331	0.0100072	0.00562876
130	0.0176881	0.00346084	0.00109794	0.00033033		110	0.0663299	0.0206177	0.0100625	0.00557712
140	0.0137423	0.00327771	0.00136579	4.23542e-05		110	0.0650919	0.0224362	0.0080946	0.00437254
						110	0.0657109	0.0215269	0.00907855	0.00497483
						120	0.0573343	0.0193019	0.00454471	0.00135271
						120	0.0583172	0.0199727	0.00453893	0.00182231
						120	0.0578257	0.0196373	0.00454182	0.00158751
						130	0.0406666	0.0181465	0.00418715	0.00142827
						130	0.0483155	0.017412	0.00367626	0.000767606
						130	0.044491	0.0175057	0.0039317	0.00109794
						140	0.030612	0.0145659	0.00258905	0.00140814
						140	0.0388148	0.0129186	0.00314766	0.00132343
						140	0.0347134	0.0137423	0.00286836	0.00136579

## Sheet: Nutritive element
Means and standard deviations								DAF	K-pericarp(mg/g)	Ca-pericarp(mg/g)	Mg-pericarp(mg/g)	K-seed coat(mg/g)	Ca-seed coat(mg/g)	Mg-seed coat(mg/g)	K-kernel(mg/g)	Ca-kernel(mg/g)	Mg-kernel(mg/g)
K	Pericarp	SD	Seed coat	SD	Kernel	SD		30	0.192775	1.71094	0.064062	0.0552817	0.233421	0.0118814	0.000179288	0.000451529	5.35483e-05
30	0.192726	4.90521e-05	0.0544566	0.0008251	0.000175949	3.33953e-06		30	0.192677	1.80708	0.0635715	0.0536315	0.276134	0.012074	0.000172609	0.000124311	2.24638e-05
40	0.304497	0.0198103	0.102254	0.00365013	0.000902411	7.16986e-05		30	0.192726	1.75901	0.0638168	0.0544566	0.254777	0.0119777	0.000175949	0.00028792	3.8006e-05
50	0.410489	0.0167176	0.188617	0.0244137	0.00114749	0.000677386		40	0.284686	2.41701	0.0908671	0.0986043	1.74598	0.0272239	0.000830712	3.34496e-05	0.000122527
60	0.449962	0.0385438	0.146989	0.00419354	0.00133035	0.000627495		40	0.324307	4.56018	0.132017	0.105905	1.71506	0.0298094	0.000974109	0.00120055	0.000328806
70	0.969113	0.0275429	0.160205	0.00553272	0.015012	0.00306851		40	0.304497	3.48859	0.111442	0.102254	1.73052	0.0285167	0.000902411	0.000617	0.000225666
80	0.815797	0.0227245	0.121946	0.00352374	0.0497657	0.000755958		50	0.427206	8.49143	0.104121	0.213031	2.55503	0.0551832	0.000470102	0.0219852	7.12374e-05
90	0.9039	0.077859	0.118987	0.0113645	0.0763891	0.00918543		50	0.393771	4.56644	0.0570577	0.164204	1.69498	0.0456121	0.00182487	0.0472489	0.000365117
100	1.37965	0.130051	0.133105	0.00364328	0.102082	0.00132659		50	0.410489	6.52893	0.0805895	0.188617	2.125	0.0503976	0.00114749	0.034617	0.000218177
110	1.4846	0.0688298	0.113612	0.0112846	0.107499	0.00793375		60	0.411418	8.3275	0.094351	0.151183	2.53405	0.0572759	0.00195784	0.0658711	0.000799295
120	1.6756	0.0525885	0.0618987	0.000284498	0.113489	0.00410246		60	0.488506	4.12957	0.0755492	0.142796	2.24946	0.0540501	0.000702855	0.0631762	0.00077905
130	1.48595	0.0771423	0.0367529	0.00304175	0.13432	0.0109198		60	0.449962	6.22854	0.0849501	0.146989	2.39175	0.055663	0.00133035	0.0645236	0.000789172
140	1.52793	0.145116	0.0278491	0.0094182	0.247796	0.0214329		70	0.996656	10.9218	0.123652	0.154672	2.34571	0.0670436	0.0198564	0.176595	0.00596304
Ca	Pericarp	SD	Seed coat	SD	Kernel	SD		70	0.941571	10.7034	0.0848366	0.165738	2.46125	0.0706236	0.0101676	0.240952	0.0042205
30	1.75901	0.048071	0.254777	0.0213563	0.00028792	0.000163609		70	0.969113	10.8126	0.104244	0.160205	2.40348	0.0688336	0.015012	0.208774	0.00509177
40	3.48859	1.07159	1.73052	0.0154624	0.000617	0.00058355		80	0.793072	0.227783	0.0389947	0.118422	1.6803	0.0500334	0.0505216	0.202114	0.0211838
50	6.52893	1.9625	2.125	0.430025	0.034617	0.0126319		80	0.838521	0.270812	0.0551305	0.125469	1.34396	0.0487936	0.0490097	0.22741	0.019077
60	6.22854	2.09897	2.39175	0.142294	0.0645236	0.00134745		80	0.815797	0.249297	0.0470626	0.121946	1.45543	0.0494135	0.0497657	0.214762	0.0201304
70	10.8126	0.109242	2.40348	0.0577681	0.208774	0.0321787		90	0.826041	0.234531	0.0561785	0.130351	1.68948	0.0469286	0.0855746	0.415816	0.0536992
80	0.249297	0.0215143	1.51213	0.151326	0.214762	0.0126478		90	0.981759	0.284165	0.0629962	0.107622	0.983957	0.0400175	0.0672037	0.323152	0.0401094
90	0.259348	0.0248167	1.33672	0.352759	0.369484	0.046332		90	0.9039	0.259348	0.0595873	0.118987	1.33672	0.043473	0.0763891	0.369484	0.0469043
100	8.24922	3.10881	0.428725	0.0744753	0.560609	0.016869		100	1.2496	5.1404	0.115329	0.136749	0.35425	0.0412073	0.100756	0.54374	0.0660349
110	10.439	2.138	0.177133	0.00331901	0.606834	0.0819602		100	1.5097	11.358	0.177594	0.129462	0.503201	0.0398991	0.103409	0.577478	0.0684915
120	14.3364	0.119068	0.347433	0.0178624	0.670963	0.0371905		100	1.37965	8.24922	0.146461	0.133105	0.428725	0.0405532	0.102082	0.560609	0.0672632
130	13.3522	1.69877	0.126397	0.00891214	0.768763	0.102038		110	1.41577	8.30095	0.134349	0.124897	0.180452	0.0286456	0.0995653	0.524873	0.0622242
140	8.69176	2.16153	0.160146	0.0772827	0.897923	0.0563966		110	1.55343	12.577	0.142901	0.102328	0.173814	0.0252756	0.115433	0.688794	0.0757641
Mg	Pericarp	SD	Seed coat	SD	Kernel	SD		110	1.4846	10.439	0.138625	0.113612	0.177133	0.0269606	0.107499	0.606834	0.0689941
30	0.0638168	0.00024526	0.0119777	9.62617e-05	3.8006e-05	1.55522e-05		120	1.72819	14.2173	0.199865	0.0616142	0.329571	0.018086	0.109386	0.633773	0.0717739
40	0.111442	0.0205751	0.0285167	0.00129276	0.000225666	0.00010314		120	1.62301	14.4555	0.135511	0.0621832	0.365296	0.0183704	0.117591	0.708154	0.0698568
50	0.0805895	0.0235318	0.0503976	0.00478553	0.000218177	0.00014694		120	1.6756	14.3364	0.167688	0.0618987	0.347433	0.0182282	0.113489	0.670963	0.0708154
60	0.0849501	0.00940092	0.055663	0.0016129	0.000789172	1.01221e-05		130	1.56309	15.051	0.160029	0.0397946	0.135309	0.0139494	0.1234	0.870801	0.0786465
70	0.104244	0.0194078	0.0688336	0.00179	0.00509177	0.00087127		130	1.4088	11.6534	0.139513	0.0337111	0.117485	0.0109271	0.14524	0.666725	0.0812721
80	0.0470626	0.00806788	0.0494135	0.000619889	0.0201304	0.0010534		130	1.48595	13.3522	0.149771	0.0367529	0.126397	0.0124382	0.13432	0.768763	0.0799593
90	0.0595873	0.00340889	0.043473	0.00345557	0.0469043	0.0067949		140	1.67305	10.8533	0.156819	0.0184309	0.235142	0.0239233	0.226363	0.841527	0.0839649
100	0.146461	0.0331723	0.0405532	0.000654135	0.0672632	0.00122833		140	1.38282	6.53023	0.104624	0.0372673	0.0851508	0.0303004	0.269228	0.95432	0.113621
110	0.138625	0.004276	0.0269606	0.00168504	0.0689941	0.00676992		140	1.52793	8.69176	0.130722	0.0278491	0.160146	0.0271119	0.247796	0.897923	0.098793
120	0.167688	0.0321768	0.0182282	0.000142249	0.0708154	0.000958519
130	0.149771	0.0102583	0.0124382	0.00151119	0.0799593	0.00131276
140	0.130722	0.0260975	0.0271119	0.00318855	0.098793	0.0148281

## Sheet: Enzymes activities
Means and standard deviations								DAF	Amylase-pericarp(mg/min/mg protein)	Amylase-seed coat(mg/min/mg protein)	Amylase-kernel(mg/min/mg protein)	Protrase-pericarp(mg/min/mg protein)	Protrase-seed coat(mg/min/mg protein)	Protrase-kernel(mg/min/mg protein)	PGI-pericarp(U/min/mg proten)	PGI-seed coat(U/min/mg proten)	MDH-pericarp(U/min/mg proten)	MDH-seed coat(U/min/mg proten)	G6PDH-pericarp(U/min/mg proten)	G6PDH-seed coat(U/min/mg proten)	PPO-pericarp(U/min/mg FW)	PPO-seed coat(U/min/mg FW)	POD-pericarp(U/min/mg FW)	POD-seed coat(U/min/mg FW)	SOD-pericarp(U/min/mg FW)	SOD-seed coat(U/min/mg FW)	MDA-pericarp(nmol/g FW)	MDA-seed coat(nmol/g FW)
Amylase activity	Pericarp	SD	Seed coat	SD	Kernel	SD		30	5.2626	0.428623	0.168887	371.197	47.368	12.1915	543.6	32.1307	0.614993	0.0100796	7.75706	38.0786	18.24	1.6	1.88155	0.0684524	1150.36	876.097	6.26707	1.5994
30	5.37066	0.108062	0.409172	0.0194505	0.160943	0.00827443		30	5.47872	0.389722	0.161568	331.771	41.1269	20.9208	538.255	35.8241	0.371373	0.185071	5.54172	38.4359	20.5333	4.06667	1.49345	0.136905	1009.59	796.411	6.50137	2.09693
40	4.37001	0.228056	0.369682	0.0117991	0.191967	0.0110268		30	5.37066	0.409172	0.152373	351.484	44.2474	16.5562	540.927	33.9774	0.493183	0.0975755	6.64939	38.2572	19.3867	2.83333	1.6875	0.102679	897.2	836.254	6.38422	1.84816
50	5.44194	0.293056	0.347763	0.00662435	0.28336	0.000817363		40	4.60394	0.357883	0.18094	283.448	36.8994	8.95877	566.43	58.8533	0.57	0.154149	9.44215	44.8754	17.8133	2.3	1.81548	0.40119	1073.85	619.024	5.01301	2.22879
60	4.20315	0.0617851	0.1257	0.000256673	0.120488	0.00803904		40	4.14833	0.381481	0.202993	388.283	35.231	17.8866	558.764	67.5647	0.56	0.0673001	8.53749	41.2728	17.28	2.03333	1.54643	0.16131	1377.46	850.462	5.0799	1.98729
70	4.22923	0.0897713	0.149136	0.0260327	0.190214	0.00829624		40	4.35776	0.369682	0.191967	335.866	36.0652	13.4227	562.597	63.209	0.44	0.110725	8.98982	43.0741	17.5467	2.16667	1.68095	0.28125	1225.65	734.743	5.04645	2.10804
80	3.3537	0.165649	0.128304	0.0119318	0.124497	0.00459338		50	5.73499	0.341138	0.282725	319.114	44.315	14.4267	734.11	108.951	0.471578	0.0757971	10.4595	44.2091	14.3467	6.36667	1.2119	0.633929	1273.16	604.041	3.29557	1.16617
90	4.38596	0.532874	0.443845	0.0302464	0.0899655	0.00211063		50	5.14888	0.354387	0.284364	351.616	46.5952	10.1425	888.787	90.3953	0.360096	0.0369513	20.6156	47.0585	14.1333	6.73333	1.25179	0.464286	1471.34	668.884	2.7645	0.600624
100	4.04068	0.117121	2.18964	0.163535	0.105526	0.00457208		50	5.44194	0.347763	0.282882	335.365	45.4551	12.2846	811.449	99.6732	0.415837	0.0563742	14.0376	45.6338	14.24	6.55	1.23185	0.549107	1372.25	636.463	3.03003	0.883397
110	4.70207	0.172974	2.82256	0.0408552	0.121334	0.0182455		60	4.26494	0.125956	0.115816	309.416	35.1679	5.51048	903.526	83.7254	0.45	0.0635337	18.5624	34.9441	12.7467	9.26667	1.58631	0.549405	1170.12	663.578	2.26926	0.162888
120	4.44676	0.0998645	3.03259	0.0709196	0.108691	0.017138		60	4.14137	0.125443	0.115211	243.876	23.6477	4.66146	712.748	57.8054	0.57	0.0651668	21.8136	43.9989	13.0133	7.36667	1.37679	0.917857	1347.06	405.806	2.13907	0.864528
130	3.75445	0.251099	2.70777	0.354668	0.0999226	0.00583986		60	4.20315	0.1257	0.130412	276.646	29.4078	5.08597	808.137	70.7654	0.39	0.0643502	20.188	39.4715	12.88	8.31667	1.48155	0.733631	1258.59	534.692	2.20417	0.20082
140	5.02177	0.179126	0.693044	0.0324731	0.131069	0.00233003		70	4.13945	0.1347	0.19851	257.406	12.4964	6.11891	1018.4	14.6985	0.903753	0.137286	15.1446	36.6603	20.2667	6.9	1.61905	0.928571	1255.85	967.635	3.58172	1.40367
Protease activity	Pericarp	SD	Seed coat	SD	Kernel	SD		70	4.319	0.175168	0.181918	264.1	22.1883	4.71074	805.73	73.9409	0.567501	0.043799	6.61232	36.0563	17.44	9.56667	1.47143	0.628571	1363.43	317.973	3.08941	0.858565
30	351.484	19.713	44.2474	3.12057	16.5562	2.36467		70	4.22923	0.149136	0.190214	260.753	17.3423	5.41483	912.063	44.3197	0.735627	0.0905425	7.26613	36.3583	18.8533	8.23333	1.54524	0.778571	1309.64	642.804	3.33556	1.13112
40	335.866	52.4174	36.0652	0.834199	13.4227	1.46394		80	3.20887	0.140236	0.119903	227.292	21.5235	4.06902	463.963	17.7259	0.43	0.0303356	19.4183	41.6121	27.0933	9.53333	1.98167	0.181667	1357.82	669.339	3.56593	1.14055
50	335.365	16.2511	45.4551	1.14009	12.2846	2.14206		80	3.53432	0.116373	0.12909	254.044	13.8729	6.05962	460.842	38.4389	0.374	0.0541204	16.1919	47.2796	27.4667	12.3333	1.91833	0.434167	1351.36	297.282	3.96719	0.190595
60	276.646	32.7701	29.4078	5.76011	5.08597	0.424507		80	3.3179	0.128304	0.124497	240.668	17.6982	5.06432	462.403	28.0824	0.4	0.042228	17.8051	44.4459	27.28	10.9333	1.95	0.307917	1354.59	483.31	3.76656	0.665573
70	260.753	3.34693	17.3423	4.84591	5.41483	0.704088		90	4.91884	0.474091	0.0920762	250.135	31.6202	4.41226	676.218	33.4831	0.559716	0.127458	17.4137	28.6964	16.96	9.33333	1.19345	0.0559524	1356.1	1431.26	1.76858	0.145499
80	240.668	13.3759	17.6982	3.82529	5.06432	0.995299		90	3.85309	0.413598	0.0878549	216.519	22.245	5.37884	596.833	55.0863	0.50057	0.737471	18.0703	20.1989	17.8667	11.3333	1.4994	0.0541667	1352.65	1203.91	2.30132	1.53746
90	233.327	16.8081	26.9326	4.68763	4.89555	0.483286		90	4.38619	0.443845	0.0899655	233.327	26.9326	4.89555	636.526	44.2847	0.530143	0.432464	17.742	24.4477	17.4133	10.3333	1.34643	0.0550595	1354.38	1317.58	2.03495	0.841479
100	192.928	3.14469	70.2323	3.96095	4.88782	0.30546		100	3.92356	2.0261	0.110098	189.783	74.1933	5.19328	749.245	39.9542	0.45	0.0109597	25.8027	29.1863	18.5067	15.6333	1.24881	0.0261905	1271.21	1434.8	2.85263	1.21261
110	257.316	7.98189	322.19	19.9728	3.54246	0.469167		100	4.15781	2.35317	0.100954	196.073	66.2714	4.58236	641.897	55.8316	0.48	0.0102683	17.3658	27.9649	21.3867	10.1333	1.30298	0.0714286	1434.07	1341.15	2.27393	0.691904
120	241.404	6.62633	433.547	16.014	4.21208	0.397209		100	4.04068	2.18964	0.105526	192.928	70.2323	4.88782	695.571	47.8929	0.51	0.010614	21.5843	28.5756	19.9467	12.8833	1.27589	0.0488095	1352.64	1387.97	2.56328	0.952255
130	183.035	25.8844	333.972	0.788383	2.74744	0.422432		110	4.52909	2.86342	0.117088	249.334	342.163	4.01163	552.571	202.344	0.50668	0.0443467	19.5338	16.1299	20	3.6	1.65893	0.0166667	1328.52	1429.26	2.34076	0.681163
140	171.859	3.7644	118.281	6.84545	2.77299	0.0866499		110	4.87504	2.78171	0.153579	265.298	302.217	3.07329	579.202	211.275	0.600627	0.035669	20.7375	12.986	21.12	3.7	1.69881	0.0142857	1366.87	1373.66	2.22952	0.521411
PGI	Pericarp	SD	Seed coat	SD				110	4.70207	2.82256	0.135334	257.316	322.19	3.54246	565.887	206.81	0.553654	0.0400079	20.1356	14.5579	20.56	3.65	1.67887	0.0154762	1347.7	1401.46	2.28514	0.601287
30	540.927	2.67274	33.9774	1.84672				120	4.54884	2.96167	0.135829	234.777	449.561	3.81488	1004.76	247.208	0.68	0	20.3066	13.4892	34.4533	3.76667	1.90893	0.0119048	1402.64	1454.51	2.00032	0.882848
40	562.597	3.83267	63.209	4.35569				120	4.34927	3.10351	0.101553	248.03	417.533	4.60929	855.77	226.451	0.54	0	20.1077	12.8948	30.88	4.76667	1.77679	0.0130952	1412.32	1444.18	1.67018	1.14639
50	771.449	47.3381	99.6732	9.2779				120	4.44217	3.03259	0.118691	241.404	433.547	4.21208	930.265	236.83	0.78	0	20.2071	13.192	32.6667	4.26667	1.84286	0.0125	1407.48	1449.35	1.83525	1.01462
60	808.137	95.3887	70.7654	12.96				130	4.00555	2.3531	0.0940827	208.92	333.183	2.32501	565.067	287.823	0.077723	0.0363138	17.5478	2.44794	28.32	4.16667	1.58214	0.0654762	1396.18	1445.69	1.88435	0.942851
70	912.063	106.333	44.3197	29.6212				130	3.50335	3.06244	0.105762	157.151	334.76	3.16987	497.047	208.311	0.49392	0	19.7206	10.835	33.12	5.06667	2.0369	0.0833333	1447.02	1487.63	0.901293	0.968693
80	462.403	1.56024	28.0824	10.3565				130	3.75445	2.70777	0.0999226	183.035	333.972	2.74744	531.057	248.067	0.285822	0.0181569	18.6342	6.64145	30.72	4.61667	1.80952	0.0744048	1421.6	1466.66	1.39282	0.955772
90	636.526	39.6925	44.2847	10.8016				140	4.84441	0.660571	0.128739	175.623	125.127	2.85964	763.489	165.373	0.16	0	16.3251	1.54453	25.0133	2.8	1.98452	0.00339881	1387.33	1459	2.0466	0.441515
100	695.571	53.6737	47.8929	7.93868				140	5.20261	0.725517	0.133399	168.094	111.436	2.68634	703.382	189.123	0.24	0	18.4607	0.868621	25.12	6.23333	1.7506	0.00595238	1427.09	1495.01	1.5269	0.199331
110	565.887	13.3152	206.81	4.46565				140	5.01829	0.693044	0.131069	171.859	118.281	2.77299	733.435	177.248	0.3	0	17.3929	1.20657	25.0667	4.51667	1.86756	0.0046756	1401.16	1477	1.78675	0.320423
120	930.265	74.4955	236.83	10.3784
130	531.057	34.0104	248.067	39.7563
140	733.435	30.0535	177.248	11.875
MDH	Pericarp	SD	Seed coat	SD
30	0.49318	0.12181	0.0975755	0.0874959
40	0.52333	0.072342	0.110725	0.0434247
50	0.41584	0.055741	0.0563742	0.0194229
60	0.47	0.091652	0.0643502	0.000816543
70	0.73563	0.168126	0.0905425	0.0467436
80	0.40133	0.028024	0.042228	0.0118924
90	0.53014	0.029573	0.432464	0.130501
100	0.48	0.03	0.010614	0.000345738
110	0.55365	0.046974	0.0400079	0.00433885
120	0.66667	0.120554	0.01187	0
130	0.28582	0.208098	0.0181569	0.0181569
140	0.23333	0.070238	0.009	0
G6PD	Pericarp	SD	Seed coat	SD
30	6.64939	1.10767	38.2572	0.178645
40	8.98982	0.45233	43.0741	1.80132
50	15.0376	3.15136	45.6338	1.42471
60	20.188	1.62561	39.4715	4.52736
70	9.67434	3.74863	36.3583	0.302015
80	17.8051	1.61316	44.4459	2.83374
90	17.742	0.32828	24.4477	4.24874
100	21.5843	4.21846	28.5756	0.610705
110	20.1356	0.601833	14.5579	1.57196
120	20.2071	0.0994283	13.192	0.297247
130	18.6342	1.08641	6.64145	4.1935
140	17.3929	1.0678	1.20657	0.337953
PPO	Pericarp	SD	Seed coat	SD
30	1.6875	0.194048	0.102679	0.0342262
40	1.68095	0.134524	0.28125	0.11994
50	1.23185	0.0199405	0.549107	0.0848214
60	1.48155	0.104762	0.713631	0.0842262
70	1.54524	0.0738095	0.778571	0.05
80	1.95	0.0316667	0.307917	0.12625
90	1.34643	0.152976	0.0550595	0.000892857
100	1.27589	0.0270833	0.0488095	0.022619
110	1.67887	0.0199405	0.0154762	0.00119048
120	1.84286	0.0660714	0.0125	0.000595238
130	1.80952	0.227381	0.0744048	0.00892857
140	1.86756	0.116964	0.0046756	0.00127679
POD	Pericarp	SD	Seed coat	SD
30	19.3867	1.14667	2.83333	1.23333
40	17.5467	0.266667	2.16667	0.133333
50	14.24	0.106667	6.55	0.183333
60	12.88	0.133333	8.31667	0.95
70	18.8533	1.41333	8.23333	1.33333
80	27.28	0.186667	10.9333	1.4
90	17.4133	0.453333	10.3333	1
100	19.9467	1.44	12.8833	2.75
110	20.56	0.56	3.65	0.05
120	32.6667	1.78667	4.26667	0.5
130	30.72	2.4	4.61667	0.45
140	25.0667	0.0533333	4.51667	1.71667
SOD	Pericarp	SD	Seed coat	SD
30	1019.05	126.847	20.7385	0.988079
40	1225.65	151.808	21.0463	3.31471
50	1372.25	99.0918	16.6873	0.850041
60	1258.59	88.4666	10.4194	2.51157
70	1309.64	53.79	14.4668	7.31058
80	1354.59	3.23189	10.2467	3.94401
90	1354.38	1.72367	69.4812	5.99469
100	1352.64	81.4294	419.377	14.1482
110	1347.7	19.1759	519.747	10.3095
120	1407.48	4.84098	539.874	1.92377
130	1421.6	25.4242	579.217	8.28113
140	1405.19	20.1851	527.038	6.42294
MDA	Pericarp	SD	Seed coat	SD
30	6.38422	0.117149	1.64816	0.248767
40	5.04645	0.0334493	2.00804	0.120751
50	3.03003	0.265533	0.883397	0.131771
60	2.20417	0.0650947	1.18094	0.0129213
70	3.33556	0.246155	1.33112	0.121092
80	3.76656	0.200627	1.19656	0.274979
90	2.03495	0.266369	0.741479	0.29598
100	2.56328	0.289349	0.552255	0.260351
110	2.28514	0.0556213	0.601287	0.079876
120	1.83525	0.165067	0.814619	0.282773
130	1.39282	0.491529	0.355772	0.194598
140	1.78675	0.259849	0.820423	0.272555
